# Supplementary material for: The Anti-Inflammatory Effect of a γ-Lactone Isolated from Ostrich Oil of Struthio camelus (Ratite) and Its Formulated Nano-Emulsion in Formalin-Induced Paw Edema
Source: MDPI journal article supplement (doi:10.3390/molecules26123701), 2021-06-17
Supplement: s1 [file s1]

Supplementary Material

# The Anti-Inflammatory Effect of a $\gamma$ -Lactone Isolated from Ostrich Oil of *Struthio camelus* (Ratite) and Its Formulated Nano-Emulsion in Formalin-Induced Paw Edema

Salah E. M. Eltom <sup>1,\*</sup>, Ahmed A. H. Abdellatif <sup>2,3</sup>, Hamzah Maswadeh <sup>2</sup>, Mohsen S. Al-Omar <sup>1</sup>, Atef A. Abdel-Hafez <sup>1</sup>, Hamdoon A. Mohammed <sup>1,4,\*</sup>, Eiman ME. Agabein <sup>5</sup>, Ibrahim Alqasoomi <sup>2</sup>, Salem A. Alrashidi <sup>1</sup>, Mohammed S. M. Sajid <sup>6</sup> and Mugahid A. Mobark <sup>7,8</sup>

- <sup>1</sup> Department of Medicinal Chemistry and Pharmacognosy, College of Pharmacy, Qassim University, Buraydah 51452, Saudi Arabia; m.omar@qu.edu.sa (M.S.A.-O.); a.abdelgalil@qu.edu.sa (A.A.A.-H.); salem11098@gmail.com (S.A.A.)
  - <sup>2</sup> Department of Pharmaceutics, College of Pharmacy, Qassim University, Buraydah 51452, Saudi Arabia; A.Abdellatif@qu.edu.sa (A.A.H.A.); msodh@qu.edu.sa (H.M.); imq3911@gmail.com (I.A.)
  - <sup>3</sup> Department of Pharmaceutics and Industrial Pharmacy, Faculty of Pharmacy, Al-Azhar University, Assiut 71524, Egypt
  - <sup>4</sup> Department of Pharmacognosy, Faculty of Pharmacy, Al-Azhar University, Cairo 11371, Egypt
  - <sup>5</sup> Department of Histology, College of Medicine, Qassim University, Buraydah 51452, Saudi Arabia; eimanagabein@qumed.edu.sa
  - <sup>6</sup> Department of Pharmacology and Toxicology, College of Pharmacy, Qassim University, Qassim 51452, Saudi Arabia; su.mohammed@qu.edu.sa
  - <sup>7</sup> Department of Pharmacy Practice, College of Pharmacy, Qassim University, Buraydah 51452, Saudi Arabia; mu.mohammed@qu.edu.sa
  - <sup>8</sup> Department of Pathology, Faculty of Medicine and Health Sciences, University of Kordofan, El-Obied 157, Sudan
- \* Correspondence: S.Eltom@qu.edu.sa (S.E.M.E.); ham.mohammed@qu.edu.sa (H.A.M.)

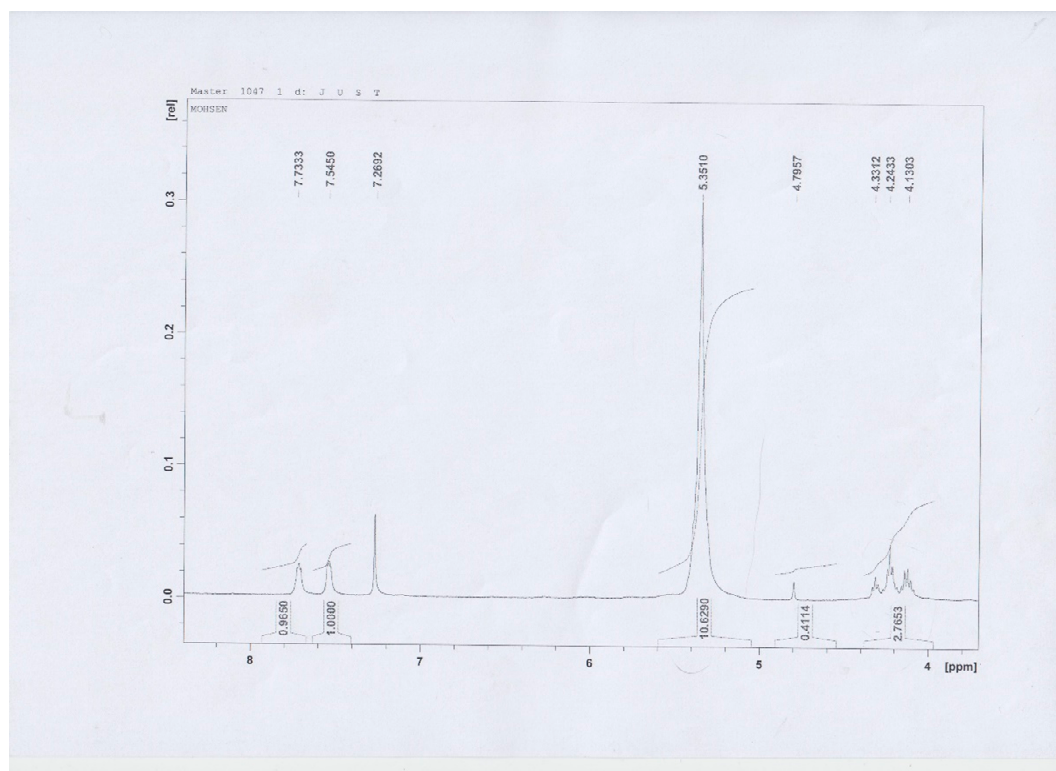

Figure S1. <sup>1</sup>H-NMR spectrum of compound 1.

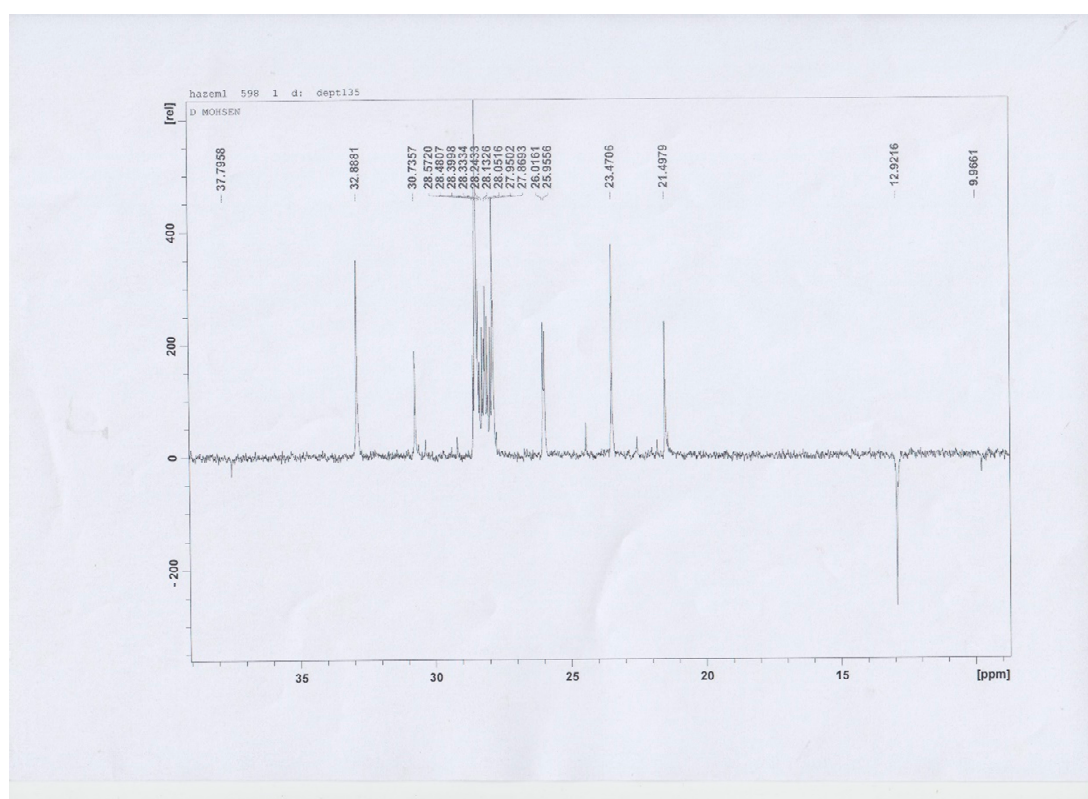

Figure S2.  $^{13}\text{C}$ -NMR spectrum of compound 1.

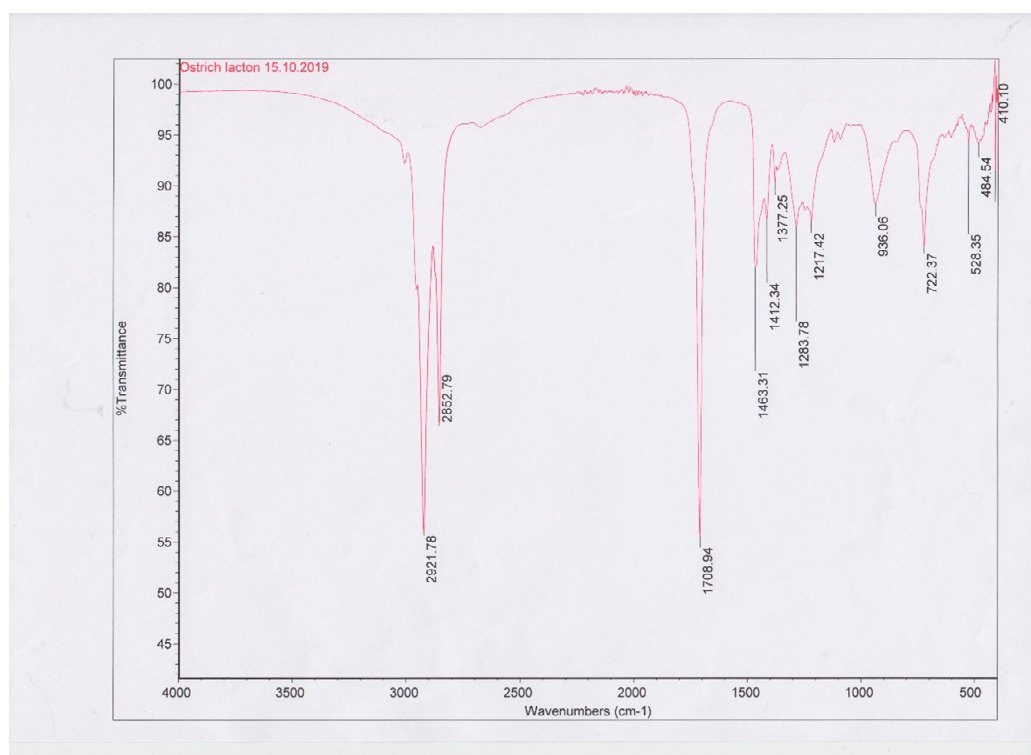

Figure S3. FT-IR spectrum of compound 1.

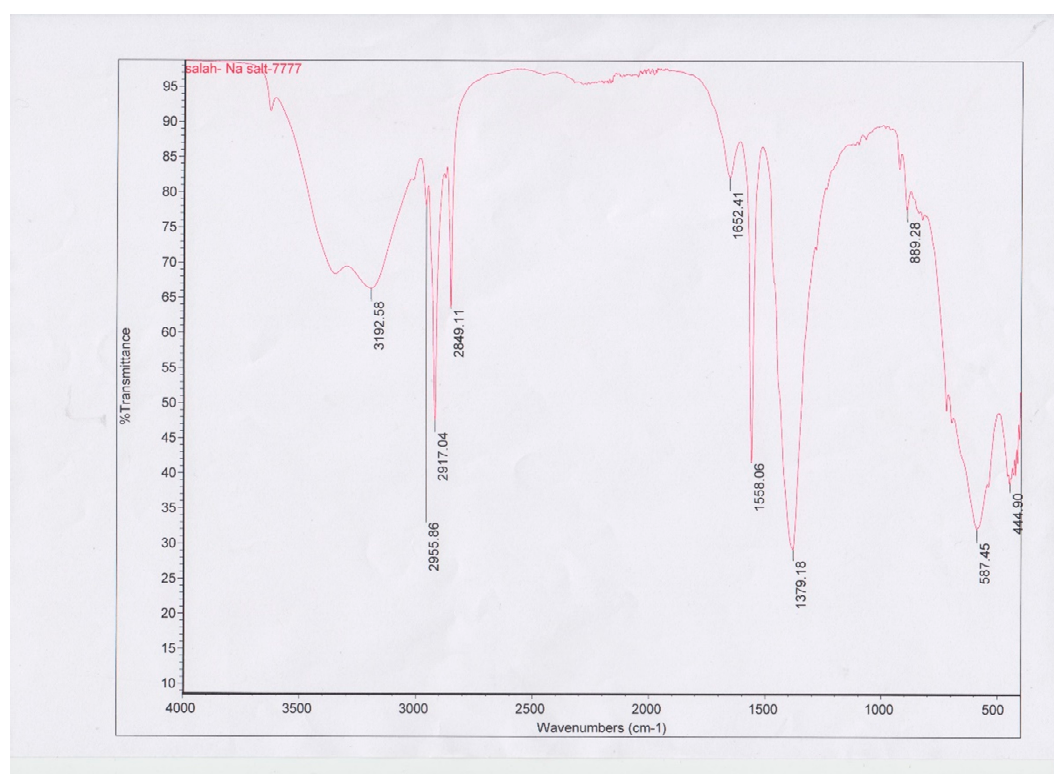

**Figure S4.** FT-IR spectra of the Na<sup>+</sup>-salt of compound **1**.

**Table S1.** The histological changes in skin - thickness measured in (mm).

| Negative Control (Right Paw) |           |           |           |                |
|------------------------------|-----------|-----------|-----------|----------------|
| Number                       | Section 1 | Section 2 | Section 3 | Average        |
| 1                            | 1.0043    | 1.0061    | 1.0059    | 1.0054         |
| 2                            | 0.9897    | 0.9896    | 0.9891    | 0.9895         |
| 3                            | 0.8915    | 0.8913    | 0.8919    | 0.8916         |
| 4                            | 0.7699    | 0.7701    | 0.7696    | 0.7699         |
| 5                            | 0.9522    | 0.9528    | 0.9523    | 0.9524         |
| 6                            | 0.828     | 0.8279    | 0.8285    | 0.8281         |
| Mean ± SEM                   |           |           |           | 0.9062 ± 0.038 |
| Positive Control (Left Paw)  |           |           |           |                |
| Number                       | Section 1 | Section 2 | Section 3 | Average        |
| 1                            | 1.3363    | 1.3362    | 1.3358    | 1.3361         |
| 2                            | 1.278     | 1.2779    | 1.2777    | 1.2779         |
| 3                            | 1.3755    | 1.3759    | 1.376     | 1.3758         |
| 4                            | 1.1907    | 1.1902    | 1.1909    | 1.1906         |
| 5                            | 1.1986    | 1.1984    | 1.1989    | 1.1986         |
| 6                            | 1.2909    | 1.2914    | 1.2913    | 1.2912         |
| Mean ± SEM                   |           |           |           | 1.2784 ± 0.030 |
| Diclofenac Gel Treated       |           |           |           |                |
| Number                       | Section 1 | Section 2 | Section 3 | Average        |
| 1                            | 0.9071    | 0.9077    | 0.9076    | 0.9075         |
| 2                            | 1.1537    | 1.1536    | 1.1534    | 1.1536         |
| 3                            | 1.2854    | 1.2861    | 1.2863    | 1.2859         |
| 4                            | 1.0718    | 1.0709    | 1.072     | 1.0716         |
| 5                            | 1.1792    | 1.1803    | 1.1805    | 1.18           |
| 6                            | 0.9892    | 0.9893    | 0.9899    | 0.9895         |

|                                                               |                                      |                                     |                           |                            |
|---------------------------------------------------------------|--------------------------------------|-------------------------------------|---------------------------|----------------------------|
| Mean $\pm$ SEM                                                |                                      |                                     |                           | 1.098 $\pm$ 0.056          |
| Diclofenac Gel Treated                                        |                                      |                                     |                           |                            |
| Number                                                        | Section 1                            | Section 2                           | Section 3                 | Average                    |
| 1                                                             | 1.0453                               | 1.0449                              | 1.0452                    | 1.0451                     |
| 2                                                             | 0.8283                               | 0.828                               | 0.8279                    | 0.8281                     |
| 3                                                             | 0.9789                               | 0.9791                              | 0.9787                    | 0.9789                     |
| 4                                                             | 1.048                                | 1.0475                              | 1.0477                    | 1.0477                     |
| 5                                                             | 0.9844                               | 0.9843                              | 0.9838                    | 0.9842                     |
| 6                                                             | 0.8044                               | 0.8043                              | 0.8043                    | 0.8043                     |
| Mean $\pm$ SEM                                                |                                      |                                     |                           | 0.9481 $\pm$ 0.036         |
| The histological changes in skin - thickness measured in (mm) |                                      |                                     |                           |                            |
| Derived for the above tables                                  |                                      |                                     |                           |                            |
| Number                                                        | Negative Con-<br>trol<br>(right paw) | Positive Con-<br>trol<br>(left paw) | Diclofenac Gel<br>Treated | $\gamma$ - Lactone Treated |
| 1                                                             | 1.0054                               | 1.3361                              | 0.9075                    | 1.0451                     |
| 2                                                             | 0.9895                               | 1.2779                              | 1.1536                    | 0.8281                     |
| 3                                                             | 0.8916                               | 1.3758                              | 1.2859                    | 0.9789                     |
| 4                                                             | 0.7699                               | 1.1906                              | 1.0716                    | 1.0477                     |
| 5                                                             | 0.9524                               | 1.1986                              | 1.1800                    | 0.9842                     |
| 6                                                             | 0.8281                               | 1.2912                              | 0.9895                    | 0.8043                     |
| Mean $\pm$ SEM                                                | 0.9062 $\pm$ 0.038                   | 1.2784 $\pm$ 0.030                  | 1.098 $\pm$ 0.056         | 0.9481 $\pm$ 0.036         |

Table S2. The anti-inflammatory activity result of control group in Plethysmometer test.

| S.no              | Body Weight (G)     | Paw Volume (mL) as Measured by Mercury Displacement at Time. |                         |                |              |               |              |              |              |              |              |
|-------------------|---------------------|--------------------------------------------------------------|-------------------------|----------------|--------------|---------------|--------------|--------------|--------------|--------------|--------------|
|                   |                     | 0 h                                                          |                         | 1 h            |              | 3 h           |              | 6 h          |              | 24 h         |              |
|                   |                     | R                                                            | L                       | R              | L            | R             | L            | R            | L            | R            | L            |
| 1                 | 28                  | 0.19                                                         | 0.21                    | 0.17           | 0.29         | 0.17          | 0.36         | 0.20         | 0.39         | 0.21         | 0.35         |
| 2                 | 34                  | 0.20                                                         | 0.21                    | 0.19           | 0.28         | 0.18          | 0.32         | 0.18         | 0.45         | 0.20         | 0.39         |
| 3                 | 18                  | 0.12                                                         | 0.11                    | 0.14           | 0.19         | 0.15          | 0.33         | 0.13         | 0.37         | 0.12         | 0.31         |
| 4                 | 24                  | 0.14                                                         | 0.14                    | 0.14           | 0.26         | 0.15          | 0.35         | 0.14         | 0.34         | 0.13         | 0.30         |
| 5                 | 26                  | 0.20                                                         | 0.22                    | 0.13           | 0.37         | 0.15          | 0.44         | 0.15         | 0.48         | 0.15         | 0.41         |
| 6                 | 32                  | 0.16                                                         | 0.16                    | 0.16           | 0.24         | 0.16          | 0.39         | 0.15         | 0.40         | 0.15         | 0.33         |
| Mean $\pm$<br>SEM | 27<br>$\pm$<br>2.35 | 0.17<br>$\pm$<br>0.01                                        | 0.175<br>$\pm$<br>0.009 | 0.155<br>0.009 | 0.27<br>0.02 | 0.16<br>0.005 | 0.37<br>0.01 | 0.16<br>0.01 | 0.41<br>0.02 | 0.16<br>0.01 | 0.35<br>0.01 |

Table S3. The ant-inflammatory activity result of 30mg/kg of oral ibuprofen suspension in Plethysmometer test.

| S.no | Body weight (G) | Paw Volume (mL) as Measured by Mercury Displacement at Time. |      |      |      |      |      |      |      |      |      |
|------|-----------------|--------------------------------------------------------------|------|------|------|------|------|------|------|------|------|
|      |                 | 0                                                            |      | 1 h  |      | 3 h  |      | 6 h  |      | 24 h |      |
|      |                 | R                                                            | L    | R    | L    | R    | L    | R    | L    | R    | L    |
| 1    | 26              | 0.23                                                         | 0.20 | 0.23 | 0.31 | 0.20 | 0.25 | 0.22 | 0.29 | 0.20 | 0.25 |
| 2    | 24              | 0.18                                                         | 0.18 | 0.19 | 0.28 | 0.20 | 0.21 | 0.18 | 0.29 | 0.22 | 0.25 |
| 3    | 38              | 0.27                                                         | 0.25 | 0.28 | 0.38 | 0.28 | 0.23 | 0.25 | 0.30 | 0.27 | 0.30 |
| 4    | 30              | 0.20                                                         | 0.21 | 0.21 | 0.33 | 0.19 | 0.33 | 0.20 | 0.29 | 0.20 | 0.25 |
| 5    | 30              | 0.19                                                         | 0.20 | 0.19 | 0.26 | 0.19 | 0.21 | 0.20 | 0.27 | 0.16 | 0.25 |
| 6    | 24              | 0.16                                                         | 0.17 | 0.15 | 0.25 | 0.17 | 0.28 | 0.17 | 0.25 | 0.15 | 0.25 |



|            |        |       |       |       |       |       |       |       |       |       |       |
|------------|--------|-------|-------|-------|-------|-------|-------|-------|-------|-------|-------|
| Mean $\pm$ | 28.667 | 0.205 | 0.202 | 0.208 | 0.302 | 0.205 | 0.252 | 0.203 | 0.282 | 0.200 | 0.258 |
| SEM        | $\pm$  | $\pm$ | $\pm$ | $\pm$ | $\pm$ | $\pm$ | $\pm$ | $\pm$ | $\pm$ | $\pm$ | $\pm$ |
|            | 2.171  | 0.016 | 0.011 | 0.018 | 0.020 | 0.016 | 0.019 | 0.012 | 0.007 | 0.018 | 0.008 |

**Table S4.** The anti-inflammatory activity result of 10ml/kg of The  $\gamma$ -lactone nano emulsion base in Plethysmometer test.

| S.no  | Body Weight (G) | Paw Volume (mL) as Measured by Mercury Displacement at Time. |       |       |       |       |       |       |       |       |       |
|-------|-----------------|--------------------------------------------------------------|-------|-------|-------|-------|-------|-------|-------|-------|-------|
|       |                 | 0                                                            |       | 1 hr  |       | 3 hr  |       | 6 hr  |       | 24 hr |       |
|       |                 | R                                                            | L     | R     | L     | R     | L     | R     | L     | R     | L     |
| 1     | 14              | 0.17                                                         | 0.16  | 0.15  | 0.25  | 0.15  | 0.17  | 0.17  | 0.18  | 0.23  | 0.24  |
| 2     | 14              | 0.17                                                         | 0.19  | 0.18  | 0.30  | 0.18  | 0.18  | 0.18  | 0.16  | 0.21  | 0.22  |
| 3     | 20              | 0.24                                                         | 0.21  | 0.22  | 0.35  | 0.23  | 0.20  | 0.23  | 0.25  | 0.25  | 0.28  |
| 4     | 20              | 0.18                                                         | 0.21  | 0.18  | 0.39  | 0.19  | 0.23  | 0.19  | 0.25  | 0.24  | 0.23  |
| 5     | 26              | 0.20                                                         | 0.23  | 0.22  | 0.35  | 0.22  | 0.27  | 0.22  | 0.25  | 0.24  | 0.22  |
| 6     | 24              | 0.19                                                         | 0.20  | 0.20  | 0.33  | 0.18  | 0.20  | 0.17  | 0.20  | 0.19  | 0.22  |
| Mean  | 19.667          | 0.192                                                        | 0.200 | 0.192 | 0.328 | 0.192 | 0.208 | 0.193 | 0.215 | 0.198 | 0.254 |
| $\pm$ | $\pm$           | $\pm$                                                        | $\pm$ | $\pm$ | $\pm$ | $\pm$ | $\pm$ | $\pm$ | $\pm$ | $\pm$ | $\pm$ |
| SEM   | 2.028           | 0.011                                                        | 0.010 | 0.011 | 0.020 | 0.012 | 0.015 | 0.011 | 0.016 | 0.016 | 0.007 |
